# Supplementary material for: The prevalence of xerostomia among e-cigarette or combustible tobacco users: A systematic review and meta-analysis
Source: PubMed Central journal article supplement (PMC9909684; doi:10.18332/tid/156676), 2023-02-09
Supplement: TID-21-22-s1.pdf [file TID-21-22-s1.pdf]

| Search strategy to be used in PubMed |                                               |
|--------------------------------------|-----------------------------------------------|
| Search line                          | Search items                                  |
| #1                                   | Xerostomia [Mesh]                             |
| #2                                   | Xerostomia                                    |
| #3                                   | dry mouth                                     |
| #4                                   | #1 OR #2 OR #3                                |
| #5                                   | Cigarette Smoking [Mesh]                      |
| #6                                   | Tobacco [Mesh]                                |
| #7                                   | Cigarette Smoking                             |
| #8                                   | Smoking                                       |
| #9                                   | Tobacco                                       |
| #10                                  | Smoker                                        |
| #11                                  | #5 OR #6 OR #7 OR #8 OR #9 OR #10             |
| #12                                  | Electronic Nicotine Delivery Systems [Mesh]   |
| #13                                  | Electronic Nicotine Delivery Systems          |
| #14                                  | e-cigarettes                                  |
| #15                                  | #12 OR #13 OR #14                             |
| #16                                  | #11 OR #15                                    |
| #17                                  | Incidence [Mesh]                              |
| #18                                  | Prevalence [Mesh]                             |
| #19                                  | Correlation of Data [Mesh]                    |
| #20                                  | Incidence                                     |
| #21                                  | Correlation                                   |
| #22                                  | Prevalence                                    |
| #23                                  | Attack Rate                                   |
| #24                                  | #17 OR #18 OR #19 OR #20 OR #21 OR #22 OR #23 |
| #25                                  | #4 AND #16 AND #24 AND (humans[Filter])       |

| Search strategy to be used in Embase |                                                                     |
|--------------------------------------|---------------------------------------------------------------------|
| #1                                   | xerostomia/exp OR 'xerostomia'                                      |
| #2                                   | ('cigarette'/exp OR cigarette) AND ('smoking'/exp OR smoking)       |
| #3                                   | tobacco/exp OR tobacco                                              |
| #4                                   | electronic AND ('cigarette'/exp OR cigarette)                       |
| #5                                   | people by smoking status'/exp OR 'people by smoking status'         |
| #6                                   | #2 OR #3 OR #4 OR #5                                                |
| #7                                   | 'prevalence'/exp OR prevalence                                      |
| #8                                   | 'incidence'/exp OR incidence                                        |
| #9                                   | ('correlation'/exp OR correlation) AND ('analysis'/exp OR analysis) |
| #10                                  | correlational study'/exp OR 'correlational study'                   |
| #11                                  | #7 OR #8 OR #9 OR #10                                               |
| #12                                  | #1 AND #6 AND #11                                                   |
| #13                                  | #1 AND #6 AND #11 AND ([chinese]/lim OR [english]/lim)              |

| Search strategy to be used in Cochrane |                                                                                                   |
|----------------------------------------|---------------------------------------------------------------------------------------------------|
| #1                                     | incidence OR prevalence OR correlation OR "attack rate"                                           |
| #2                                     | Cigarette Smoking OR Tobacco OR "Electronic Nicotine Delivery Systems" OR Smoking OR e-cigarettes |
| #3                                     | "dry mouth" OR xerostomia                                                                         |
| #4                                     | #1 AND #2 AND #3                                                                                  |
| URL:Advanced Search   Cochrane Library |                                                                                                   |

| Search strategy to be used in Wos                                                                                                                                                                                                      |                                                                                                                    |
|----------------------------------------------------------------------------------------------------------------------------------------------------------------------------------------------------------------------------------------|--------------------------------------------------------------------------------------------------------------------|
| #1                                                                                                                                                                                                                                     | TS=(Xerostomia OR (dry mouth))                                                                                     |
| #2                                                                                                                                                                                                                                     | TS=((Cigarette Smoking) OR Tobacco OR Smoking OR Smoker OR (Electronic Nicotine Delivery Systems) OR e-cigarettes) |
| #3                                                                                                                                                                                                                                     | TS=(incidence OR prevalence OR correlation OR (Attack Rate))                                                       |
| #4                                                                                                                                                                                                                                     | #1 AND #2 AND #3                                                                                                   |
| URL: <a href="https://www.webofscience.com/wos/ai/db/summary/07/153490-6316-4171-ae07-fddh1d14b87e-5ad55a45/relevance/1">https://www.webofscience.com/wos/ai/db/summary/07/153490-6316-4171-ae07-fddh1d14b87e-5ad55a45/relevance/1</a> |                                                                                                                    |

| Search strategy to be used in Chinese National Knowledge Infrastructure (CNKI)                                                                                                              |                          |
|---------------------------------------------------------------------------------------------------------------------------------------------------------------------------------------------|--------------------------|
| Keyword and Abstract:                                                                                                                                                                       |                          |
| #1                                                                                                                                                                                          | 电子烟 + 吸烟 + 烟草 + 香烟 + 尼古丁 |
| #2                                                                                                                                                                                          | 口干 + 口腔干燥 + 口干症          |
| #3                                                                                                                                                                                          | 发生率 + 率                  |
| #4                                                                                                                                                                                          | #1 AND #2 AND #3         |
| <a href="https://kns.cnki.net/kns8/AdvSearch?dbprefix=CFLS&amp;&amp;crossDbcodes=CJFQ%2CCCDMD%2">https://kns.cnki.net/kns8/AdvSearch?dbprefix=CFLS&amp;&amp;crossDbcodes=CJFQ%2CCCDMD%2</a> |                          |

| Search strategy to be used in China Science and Technology Journal Database(VIP)                                                                    |  |
|-----------------------------------------------------------------------------------------------------------------------------------------------------|--|
| 检索式检索                                                                                                                                               |  |
| ((((题名或关键词=电子烟 OR 题名或关键词=吸烟) OR 题名或关键词=烟草) OR 题名或关键词=香烟) OR 题名或关键词=烟) AND ((题名或关键词=口干 OR 题名或关键词=口腔干燥) OR 题名或关键词=口干症)) AND (题名或关键词=发生率 OR 题名或关键词=率)) |  |
| 高级检索-【维普期刊官网】- 中文期刊服务平台 (cqvip.com)                                                                                                                 |  |

| Search strategy to be used in Wan-Fang Database |                            |
|-------------------------------------------------|----------------------------|
| 文献类型 期刊论文、学位论文、中外标准                             |                            |
| 检索信息 题名或关键词/模糊                                  |                            |
| #1                                              | 电子烟 OR 吸烟 OR 烟草 OR 香烟 OR 烟 |
| #2                                              | 口干 OR 口腔干燥 OR 口干症          |
| #3                                              | #1 AND #2                  |
| 万方数据知识服务平台 (wanfangdata.com.cn)                 |                            |

| Search strategy to be used in Chinese Biomedical Literature Database (CBM)                                         |                                                                                     |
|--------------------------------------------------------------------------------------------------------------------|-------------------------------------------------------------------------------------|
| 检索条件 ("口腔干燥"[不加权:扩展] AND (((("吸烟"[不加权:扩展]) OR "烟草"[不加权:扩展]) OR "电子烟"[不加权:扩展]) OR "尼古丁"[不加权:扩展]) OR "烟草制品"[不加权:扩展]) |                                                                                     |
| URL                                                                                                                | <a href="http://www.sinomed.ac.cn/index.jsp">http://www.sinomed.ac.cn/index.jsp</a> |

## Supplementary Material 1.

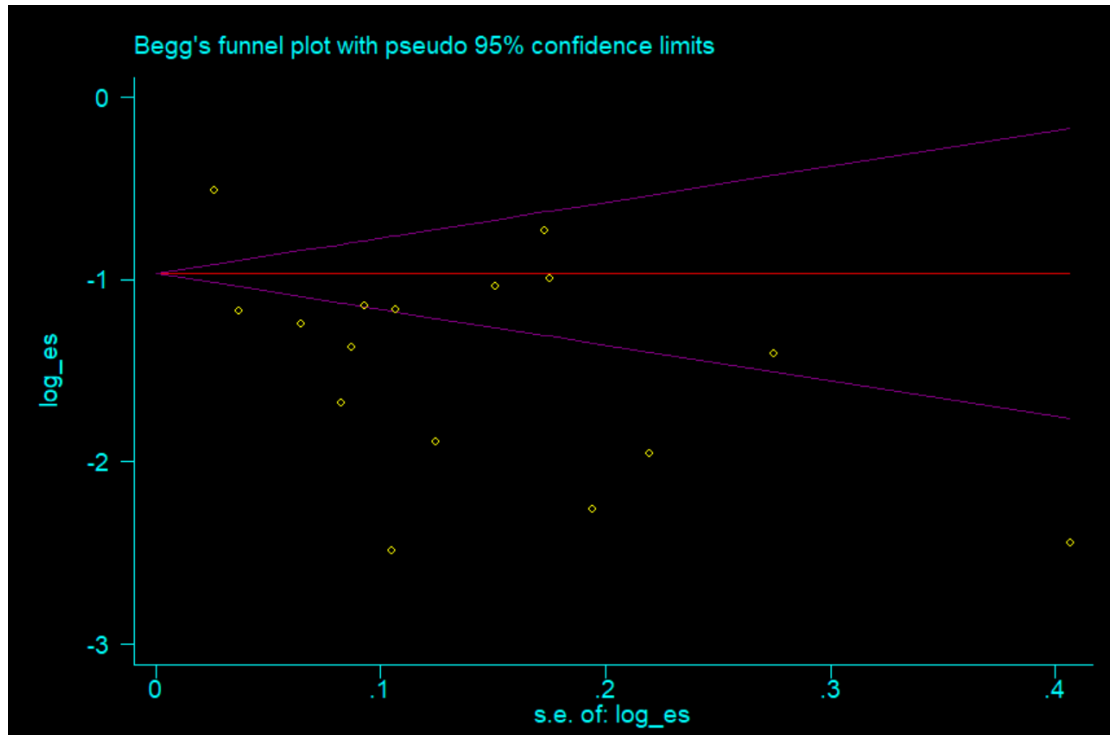

### Begg's Test

```
adj. Kendall's Score (P-Q) = 16
Std. Dev. of Score = 22.21
Number of Studies = 16
z = 0.72
Pr > |z| = 0.471
z = 0.68 (continuity corrected)
Pr > |z| = 0.499 (continuity corrected)
```

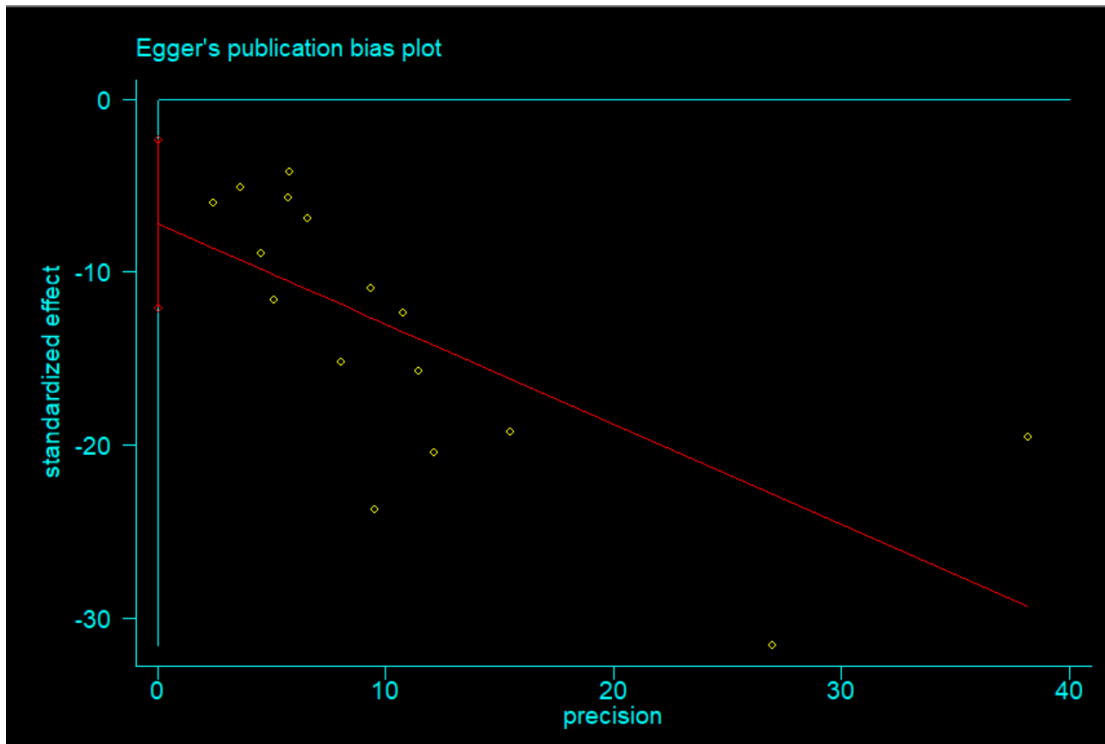

Egger's test

| Std_Eff | Coef.     | Std. Err. | t     | P> t  | [95% Conf. Interval] |           |
|---------|-----------|-----------|-------|-------|----------------------|-----------|
| slope   | -.5782297 | .1598537  | -3.62 | 0.003 | -.9210818            | -.2353776 |
| bias    | -7.214132 | 2.275731  | -3.17 | 0.007 | -12.09509            | -2.333175 |

# Supplementary Material 2 Forest Plot of Subgroup Analyses

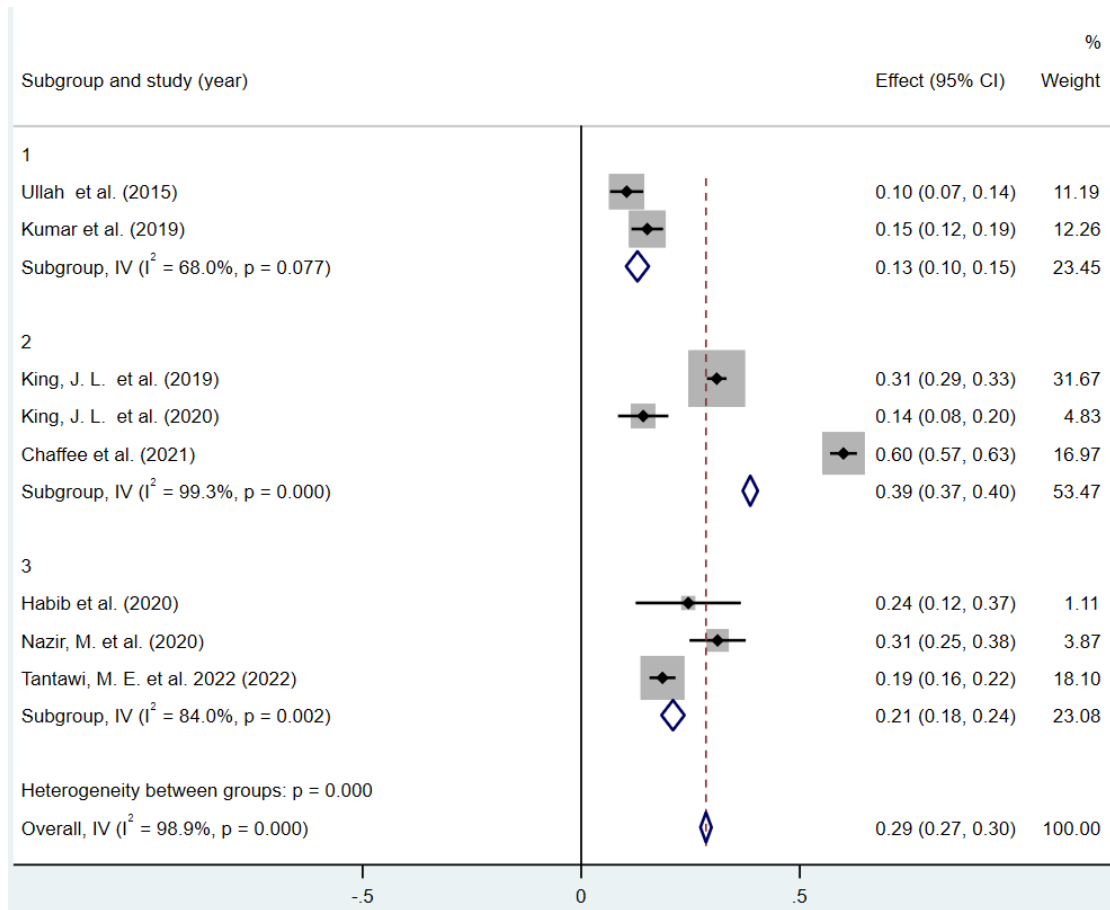

Fig 1. The effect Size and 95% CI of included studies based on Country

1: Pakistan; 2: American; 3: Saudi Arabia.

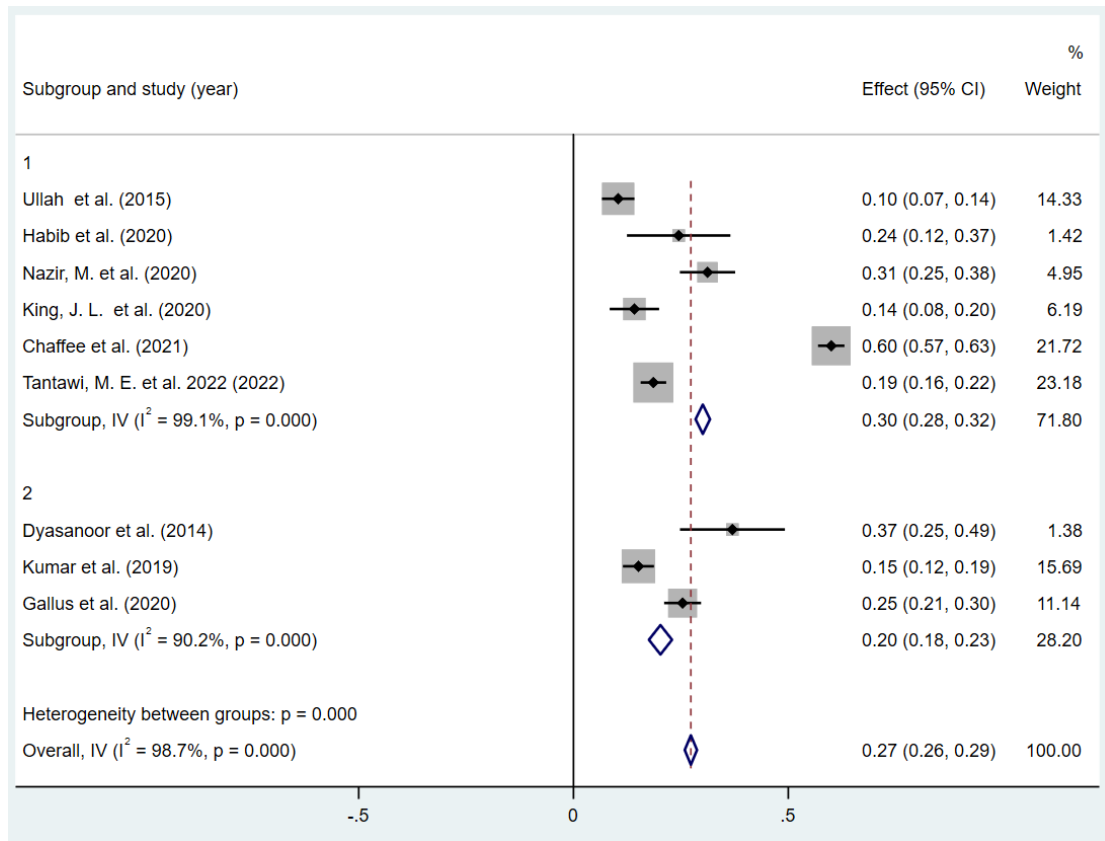

Fig 2. The effect Size and 95% CI of included studies based on Age  
 1:  $\leq 25$ ; 2: 25-65
